# Supplementary material
Source: PubMed Central journal article supplement (PMC3116509)
Supplement: Supp_Data.pdf [file Supp_Data.pdf]

TABLE S1. PRIMERS USED FOR THE GENERATION OF RESPONSE REGULATOR NULL MUTANTS

| Strain designation | Gene                      | Primer Name                                                                  | Primer sequences 5' to 3' <sup>a</sup>                                                                                                                               |
|--------------------|---------------------------|------------------------------------------------------------------------------|----------------------------------------------------------------------------------------------------------------------------------------------------------------------|
| B4-007             | <i>lisRK</i> <sup>b</sup> | KDBlisRKSoeA<br>KDBlisRKSoeB<br>KDBlisRKSoeC<br>KDBlisRKSoeD                 | <b>CGG GGTACC TCTTAAAACTTACTACTTGATCC</b><br>TATTCTATTCATTTGGCCTAACCC<br>GGGTAGGCCAAATGAATAGAATA ATGCGTACATGACGACTAGCC<br><b>CGC GGATCC ATTATCATCTGCTACAATCGGCAT</b> |
| B2-078             | <i>agrA</i>               | CRL01agrAsoeA<br>CRL02agrAsoeB<br>CRL03agrAsoeC<br>CRL04agrAsoeD             | <b>G GAATT CGCTCAAGAGTTGAAAATTGATGC</b><br>CGGTAGCATAAATTCATCCCC<br>GGGGATGAATTTATGCTACCG AGCTTGAGTTTATAAAAAGTGGCC<br><b>CG GGATCC CACTACGCTTAATCCGATACGT</b>        |
| B2-080             | <i>resD</i>               | SRMresDSoeA<br>SRMresDSoeB<br>SRMresDSoeC<br>SRMresDSoeD                     | <b>CGC GGATCC AAACGAAAGATAAAGCCATTG</b><br>CACTCTAACTTGTTCACTC<br>GAGTGAACAAGTTAGAGTG GGATATAAATTTGAAGTTCCAG<br><b>CGG GGTACC TGTCTGAATTAATTTATTGGC</b>              |
| B2-086             | <i>lmo1022</i>            | BB7 lmo1022SoeA<br>BB8 lmo1022SoeB<br>BB9 lmo1022SoeC<br>BB10 lmo1022SoeD    | <b>GG GGTACCT GCCAATCGAAGTAGAATGGC</b><br>TATCATTGCTTTCCACGTC<br>GGACBTGGAAAGCGAATGATA GACCTAGTAGAAAAAAGTAGCA<br><b>GG AAGCTT GGCATGCTTATCATTTTGTCGC</b>             |
| B2-096             | <i>lmo1060</i>            | BB11 lmo1060SoeA<br>BB12 lmo1060SoeB<br>BB13 lmo1060SoeC<br>BB14 lmo1060SoeD | <b>GG GGTACC AACACCAGAAAAACACGTG</b><br>GAGTATTTTTCCATATTTGCC<br>GGCAAATATGGAAAAAATACTC AAAATTCAAACGATTAGAGGT<br><b>G TCTAGA ATTTTTGTTTCTGTTCCACC</b>                |
| C5-017             | <i>lmo2010</i>            | YC10 lmo2010A<br>YC11 lmo2010B<br>YC12 lmo2010C<br>YC13 lmo2010D             | <b>A GGATCC CCAAGGTTGCTCTGCAG</b><br>ACCTTTGAGAATAAGGGGCTC<br>GAGCCCCTTATTCTCAAAGGT TCTGGTTATACCGATATGGCTTAT<br><b>C GAATTC CACCCAGTCACTGCTCAT</b>                   |
| C5-019             | <i>lmo2583</i>            | YC6 lmo2583A<br>YC7 lmo2583B<br>YC8 lmo2583C<br>YC9 lmo2583D                 | <b>G GGATCC CGGCACTATGTAGTTCAGC</b><br>CACAAGTTAAGTATATGCCGATC<br>GATCGGCATATACTTAAACTTGTG CCCGTGAAAGAATTTGAGCT<br><b>T GAATTC AAAGAAATCGTAGCATTTGACTCG</b>          |
| B2-100             | <i>phoP</i>               | WS5 phoPA<br>WS6 phoPB<br>WS7 phoPC<br>WS8 phoPD                             | <b>GA GGTACC CACGGATTGAAATACCAACG</b><br>TTCGGTTATAAAATGGAGAACC<br>GTTCTCCATTTTATAACCGAA AGAATTTTTACCAACGTACTTCC<br><b>CT AAGCTT GCTTGTAGTTTTGGGTGC</b>              |
| C5-041             | <i>virR</i>               | YC41 lmo1745A<br>YC42 lmo1745B<br>YC43 lmo1745C<br>YC44 lmo1745D             | <b>G GGATCC ACTTCAAATTAGTTACAGATGCTG</b><br>TACTACACCAATCTCAAATCCC<br>GGGATTTGAGATTGGTGTAGTA GCAGAAATGGTTTGAGCG<br><b>T GAATTC CTCAACTAAAGCTCGACCT</b>               |
| C5-036             | <i>lmo1507</i>            | YC35 lmo1507A<br>YC36 lmo1507B<br>YC37 lmo1507C<br>YC38 lmo1507D             | <b>A GGATCC GCCGATTGAATGGTAAAACCTGA</b><br>CGTTTCATAACCCATTTTGCC<br>GGCAAATGGGTTATGAAGCG CGTTTACGCCAAAAAATCGC<br><b>GTA GTCGAC GAGAAATCCTTAGGTAAAGGCTGA</b>          |
| C5-033             | <i>degU</i>               | YC29 lmo2515A<br>YC30 lmo2515B<br>YC31 lmo2515C<br>YC32 lmo2515D             | <b>G GGATCC GTGTTTTCCATCGCTATGGATG</b><br>AATTCGCTTGATACCTTCGC<br>GCGAAGGTATCAAGCGAATT GTAACGGCAATCAAGCAGC<br><b>CAT GTCGAC CAATGGCTCGTTTGCCAA</b>                   |
| B2-104             | <i>kdpE</i>               | WS1 lmo2678A<br>WS2 lmo2678B<br>WS3 lmo2678C<br>WS4 lmo2678D                 | <b>CT GGATCC CCATACGATTCTCCAGCGAG</b><br>GTTGGGGTTGGATACCGG<br>CCGGTATCCAACCCCAAC TAGCACAAGCCGCTTGCTG<br><b>GT AAGCTT GACTGATTGAGCAAGTGC</b>                         |
| B2-105             | <i>cheY</i>               | BB27 cheYSoeA<br>BB28 cheYSoeB<br>BB29 cheYSoeC<br>BB30 cheYSoeD             | <b>G TCTAGA CAACTAAAGCATCTGCTTC</b><br>ATTCTTAATCATCGTACGCAT<br>ATGCGTACGATGATTAAGAAT GACCGAGTTTTAGAGGCG<br><b>GG GGTACC AATTTGAATGGCAATACGGTA</b>                   |
| B2-102             | <i>cesR</i>               | BB3 cesRSoeA<br>BB4 cesRSoeB<br>BB5 cesRSoeC<br>BB6 cesRSoeD                 | <b>GG GGTACC CTGTCATCGCAATTCTAACGG</b><br>AGAAGTTGTCATACTCATTTGCC<br>GGACAATGAGTATGACAACCTCT TACAAAATTGAAATCTAAACTGG<br><b>G TCTAGA GTTCCCGCATATTTTCGATG</b>         |

<sup>a</sup>Clamp sequences for SOE-A and SOE-D primers are bolded; restriction sites for SOE-A and SOE-D primers are italicized; overhangs complementary to SOE-B primers are underlined.

<sup>b</sup>This mutant includes an internal deletion of the *lisR* gene, which also removed a portion of the ribosome binding site of *lisK* sensory kinase gene.

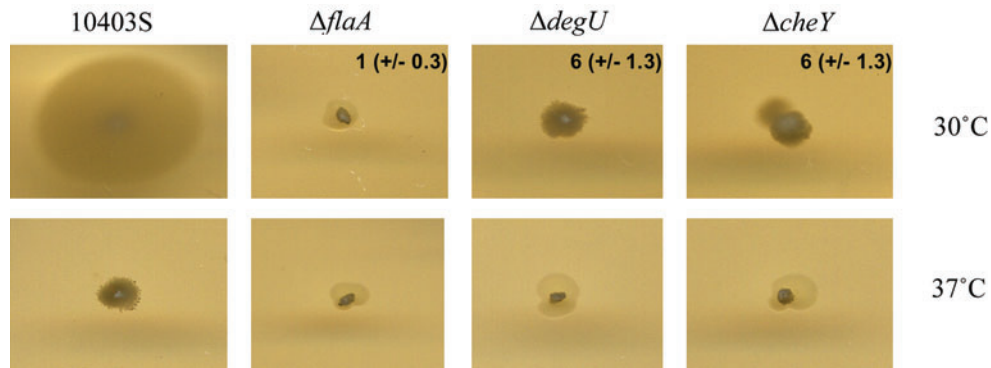

**FIG S1.** Swarming behavior of parent strain,  $\Delta degU$ ,  $\Delta cheY$ , and  $\Delta flaA$  strains grown at 24°C, 30°C, or 37°C. Three independent trials of the motility assays were performed and each strain was tested in triplicate in a given trial. Images show representative results. Pixel counts of the swarming areas were determined to quantitate swarming areas and relative swarming of the mutant strain was expressed relative to parent strain swarming (which was set at 100%). Relative swarming is shown for mutant strains grown at 30°C (values shown represent average  $\pm$  standard deviation). No detectable swarming was observed for the mutants at 37°C and hence no relative swarming values are shown.

**TABLE S2. SUMMARY OF GENE DELETION EFFECTS ON TRANSCRIPTION LEVELS OF VARIOUS *LISTERIA MONOCYTOGENES* STRESS AND VIRULENCE GENES**

*p*-Values for the effects of various gene deletion effects on *L. monocytogenes* gene transcription measured in stationary phase at:

| Gene        | 30°C                     |             |                  | 37°C                 |                      |                  |
|-------------|--------------------------|-------------|------------------|----------------------|----------------------|------------------|
|             | <i>sigB</i> <sup>a</sup> | <i>prfA</i> | <i>sigB*prfA</i> | <i>sigB</i>          | <i>prfA</i>          | <i>sigB*prfA</i> |
| <i>inlA</i> | <0.0001 <sup>b</sup>     | 0.2961      | 0.3139           | <0.0001 <sup>b</sup> | 0.1282               | 0.0799           |
| <i>flaA</i> | 0.0003 <sup>b</sup>      | 0.7317      | 0.7263           | 0.4051               | 0.9589               | 0.4016           |
| <i>plcA</i> | 0.0475                   | 0.6952      | 0.5122           | 0.2593               | <0.0001 <sup>b</sup> | 0.1808           |
| <i>gadA</i> | <0.0001 <sup>b</sup>     | 0.9887      | 0.8895           | <0.0001 <sup>b</sup> | 0.6512               | 0.8698           |

<sup>a</sup>The variables listed in this column represent either a single gene deletions (e.g., “*sigB*”) or interactions between two gene deletions (e.g., “*sigB\*prfA*”). The *p*-values for the single gene deletions measure the individual effect of deleting each respective gene. The “gene\*gene” variable measures synergistic deletion effects by comparing the effect of deleting both genes to the effect of deleting either one gene or the other; significant values are marked with <sup>b</sup>(*p*-value  $\leq$  0.001). The actual data used for these analyses are presented in Figure 4.
